# Supplementary material for: Using geospatial modelling to estimate the prevalence of adolescent first births in Nepal
Source: PubMed Central journal article supplement (PMC6606082; doi:10.1136/bmjgh-2018-000763), 2019-07-01
Supplement: bmjgh-2018-000763supp001.pdf [file bmjgh-2018-000763supp001.pdf]

1 **Supplementary Material S1: Predicted prevalence by administrative III units of first births**  
2 **for women aged 20-29years (a) <16 years, (b) 16/17 years, (c) 18/19 years and (d) <20**  
3 **years: Nepal DHS 2011**

4

| Region      | District       | Predicted prevalence estimates |                |                |              |
|-------------|----------------|--------------------------------|----------------|----------------|--------------|
|             |                | <16<br>years                   | 16/17<br>years | 18/19<br>years | <20<br>years |
| Central     | Nuwakot        | 0.055                          | 0.112          | 0.145          | 0.302        |
| Central     | KavrePalanchok | 0.055                          | 0.112          | 0.145          | 0.301        |
| Central     | Lalitpur       | 0.070                          | 0.131          | 0.152          | 0.350        |
| Central     | Kathmandu      | 0.051                          | 0.121          | 0.165          | 0.274        |
| Central     | Bhaktapur      | 0.032                          | 0.115          | 0.178          | 0.281        |
| Central     | Chitwan        | 0.057                          | 0.134          | 0.186          | 0.405        |
| Central     | Dolakha        | 0.038                          | 0.136          | 0.193          | 0.353        |
| Central     | Makwanpur      | 0.063                          | 0.171          | 0.205          | 0.464        |
| Central     | Sindhuli       | 0.063                          | 0.185          | 0.214          | 0.456        |
| Central     | Parsa          | 0.093                          | 0.211          | 0.215          | 0.566        |
| Central     | Rautahat       | 0.035                          | 0.152          | 0.230          | 0.431        |
| Central     | Bara           | 0.039                          | 0.162          | 0.237          | 0.455        |
| Central     | Mahottari      | 0.099                          | 0.231          | 0.243          | 0.534        |
| Central     | Sindhupalchok  | 0.038                          | 0.182          | 0.247          | 0.491        |
| Central     | Sarlahi        | 0.060                          | 0.208          | 0.252          | 0.509        |
| Central     | Dhanusa        | 0.111                          | 0.259          | 0.254          | 0.665        |
| Central     | Dhading        | 0.035                          | 0.192          | 0.263          | 0.517        |
| Central     | Rasuwa         | 0.067                          | 0.259          | 0.282          | 0.552        |
| Central     | Ramechhap      | 0.084                          | 0.283          | 0.295          | 0.624        |
| East        | Dhankuta       | 0.044                          | 0.133          | 0.184          | 0.346        |
| East        | Morang         | 0.034                          | 0.122          | 0.184          | 0.364        |
| East        | Sunsari        | 0.040                          | 0.134          | 0.185          | 0.381        |
| East        | Udayapur       | 0.041                          | 0.141          | 0.194          | 0.346        |
| East        | Jhapa          | 0.038                          | 0.141          | 0.194          | 0.304        |
| East        | Ilam           | 0.019                          | 0.118          | 0.206          | 0.261        |
| East        | Bhojpur        | 0.033                          | 0.144          | 0.209          | 0.380        |
| East        | Siraha         | 0.090                          | 0.205          | 0.209          | 0.508        |
| East        | Khotang        | 0.025                          | 0.134          | 0.227          | 0.375        |
| East        | Taplejung      | 0.022                          | 0.133          | 0.227          | 0.381        |
| East        | Terhathum      | 0.022                          | 0.136          | 0.229          | 0.362        |
| East        | Panchthar      | 0.020                          | 0.133          | 0.231          | 0.383        |
| East        | Sankhuwasabha  | 0.032                          | 0.150          | 0.233          | 0.420        |
| East        | Saptari        | 0.056                          | 0.189          | 0.237          | 0.456        |
| East        | Solukhumbu     | 0.031                          | 0.177          | 0.255          | 0.438        |
| East        | Okhaldhunga    | 0.042                          | 0.206          | 0.266          | 0.476        |
| Far-Western | Baitadi        | 0.039                          | 0.141          | 0.210          | 0.404        |
| Far-Western | Kanchanpur     | 0.053                          | 0.158          | 0.214          | 0.437        |
| Far-Western | Kailali        | 0.052                          | 0.157          | 0.214          | 0.452        |

|             |               |       |       |       |       |
|-------------|---------------|-------|-------|-------|-------|
| Far-Western | Darchula      | 0.028 | 0.159 | 0.262 | 0.459 |
| Far-Western | Doti          | 0.054 | 0.217 | 0.273 | 0.526 |
| Far-Western | Dadeldhura    | 0.056 | 0.229 | 0.279 | 0.576 |
| Far-Western | Bajura        | 0.057 | 0.243 | 0.286 | 0.589 |
| Far-Western | Achham        | 0.064 | 0.272 | 0.308 | 0.605 |
| Far-Western | Bajhang       | 0.080 | 0.304 | 0.328 | 0.665 |
| Mid-Western | Dang Deokhuri | 0.070 | 0.168 | 0.213 | 0.486 |
| Mid-Western | Banke         | 0.055 | 0.171 | 0.222 | 0.487 |
| Mid-Western | Bardiya       | 0.060 | 0.186 | 0.237 | 0.467 |
| Mid-Western | Surkhet       | 0.041 | 0.154 | 0.238 | 0.513 |
| Mid-Western | Pyuthan       | 0.031 | 0.158 | 0.239 | 0.391 |
| Mid-Western | Rukum         | 0.031 | 0.159 | 0.249 | 0.496 |
| Mid-Western | Dailekh       | 0.071 | 0.228 | 0.257 | 0.541 |
| Mid-Western | Salyan        | 0.029 | 0.164 | 0.258 | 0.469 |
| Mid-Western | Dolpa         | 0.041 | 0.185 | 0.263 | 0.516 |
| Mid-Western | Rolpa         | 0.049 | 0.201 | 0.265 | 0.544 |
| Mid-Western | Jumla         | 0.059 | 0.242 | 0.286 | 0.604 |
| Mid-Western | Jajarkot      | 0.056 | 0.238 | 0.286 | 0.600 |
| Mid-Western | Mugu          | 0.077 | 0.285 | 0.307 | 0.621 |
| Mid-Western | Kalikot       | 0.090 | 0.296 | 0.313 | 0.685 |
| Mid-Western | Humla         | 0.088 | 0.309 | 0.320 | 0.623 |
| West        | Manang        | 0.057 | 0.114 | 0.149 | 0.314 |
| West        | Gulmi         | 0.057 | 0.114 | 0.149 | 0.314 |
| West        | Mustang       | 0.057 | 0.114 | 0.150 | 0.317 |
| West        | Kaski         | 0.055 | 0.125 | 0.155 | 0.317 |
| West        | Rupandehi     | 0.049 | 0.124 | 0.171 | 0.325 |
| West        | Gorkha        | 0.047 | 0.136 | 0.189 | 0.375 |
| West        | Syangja       | 0.028 | 0.121 | 0.196 | 0.338 |
| West        | Baglung       | 0.031 | 0.137 | 0.206 | 0.371 |
| West        | Parbat        | 0.022 | 0.114 | 0.210 | 0.312 |
| West        | Tanahu        | 0.035 | 0.146 | 0.219 | 0.414 |
| West        | Palpa         | 0.026 | 0.138 | 0.226 | 0.408 |
| West        | Nawalparasi   | 0.031 | 0.144 | 0.232 | 0.427 |
| West        | Kapilvastu    | 0.036 | 0.153 | 0.236 | 0.408 |
| West        | Arghakhanchi  | 0.028 | 0.151 | 0.241 | 0.433 |
| West        | Myagdi        | 0.028 | 0.160 | 0.252 | 0.464 |
| West        | Lamjung       | 0.042 | 0.199 | 0.267 | 0.485 |

1  
2  
3  
4  
5  
6  
7  
8
